# Supplementary material
Source: Springer Nature journal article supplement (https://www.springermedizin.de/resource/supplementary/12879_2012_1990_MOESM1_ESM.pdf/9443488)

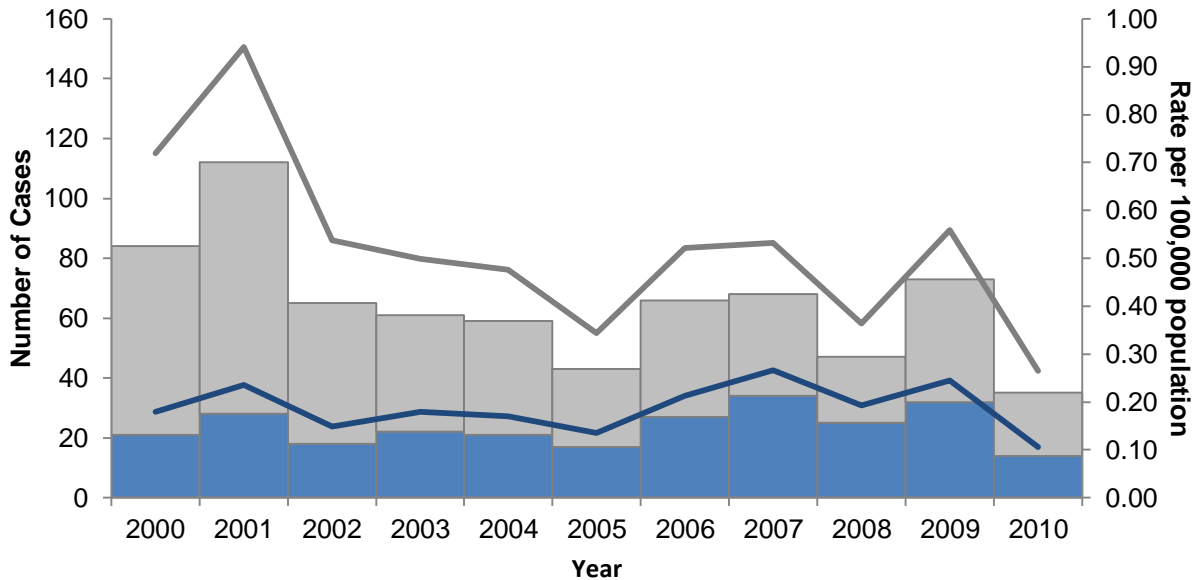

■ Serogroup B 
 ■ Others 
 — Overall IMD rate 
 — Serogroup B rate

Supplement: MOESM1 [file 9443488]
